# Supplementary material for: AAV-Mediated Expression of Human VEGF, TNF-α, and IL-6 Induces Retinal Pathology in Mice
Source: PubMed Central journal article supplement (PMC8444492; doi:10.1167/tvst.10.11.15), 2021-09-14
Supplement: tvst-10-11-15_s001.pdf [file tvst-10-11-15_s001.pdf]

## Supplemental Tables

**Supplemental Table 1: Antibodies used in this study.** HIER = Heat induced epitope retrieval

| Antigen                           | Host    | Dilution         | Antigen retrieval             | Source                              |
|-----------------------------------|---------|------------------|-------------------------------|-------------------------------------|
| Anti-Iba1<br>(flat mounts)        | Rabbit  | 1:500            | -                             | ab178846, Abcam                     |
| Anti-Iba1<br>(sections)           | Rabbit  | 1:1000           | HIER: pH 9, 95°C, 20 min      | 019-19741, Wako                     |
| Anti-GFAP                         | Rabbit  | 1:8000           | HIER: pH 9, 95°C, 20 min      | Ab7260, Abcam                       |
| Anti-CD31                         | Goat    | 1:200            | Leica Enzyme kit, 37°C, 5 min | AF3628, RnD systems                 |
| Anti-GFP                          | Rabbit  | 1:1000           | Leica Enzyme kit, 37°C, 5 min | Ab290, Abcam                        |
| Anti-goat-HRP                     | Rabbit  | 1:500            | -                             | 5160-2504, Biozol                   |
| OPAL<br>Secondary<br>antibodies   | unknown | Ready-<br>to-use | -                             | SKU ARH1001EA,<br>Akoya Biosciences |
| anti-rabbit<br>Alexa Fluor<br>568 | Goat    | 1:1000           | -                             | A11011, Molecular<br>Probes         |

## Supplemental Methods

### AAV-stuffer sequence

TAAAACAAAACAAAACAAAATAAAACAAAAAAGGAAGGAAAAAAAAAGAAAAATTTA  
AAAAATTTTAAAAATATAACGAGGGATAAATTTTTGGTGGTGATAGTGTCCCAGTACAAA  
AAGGCTGTAAGATAGTCAACCACAGTAGTCACCTATGTCTGTGCCTCCCTTCTTTATTG  
GGGACATGTGGGCTGGAACAGCAGATTTTCAGCTACATATATGAACAAATCCTTTATTATT  
ATTATAATTATTTTTTTGCGTGAAAGTGTTACATATTCTTTCACTTGTATGTACAGAGAGG  
TTTTTCTGAATATTTATTTAAGGGTTAAATCACTTTTGCTTGTGTTTATTACTGCTTGAG  
GTTGAGCCTTTTGAGTATTTAAAAATATATACCAACAGAACTACTCTCCAAGGAAAAT  
ATTGCCACCATTTGTAGTCCACGTAACCTTCAAGTATGTGCTACTTTTTGTCCCTGTAT  
CTAACTCAAATCAGGAAGTGTATTTTTTTAATGATTTGCTTTTGAACTTGAAGTCTTGA  
AACAGTGTGATGCAATTACTGCTGTTCTAGCCCCAAAGAGTTTTCTGTGCAAAATCTT  
GAGAATCAATCAATAAAGAAAGATGGAAGGAAGGGAGAAATTGGAATGTTTTAACTGCA  
GCCCTCAGAAGTCTTAGTAACAGCACAAATAAAAACAAAACAAGTCAATGCCCACAGT  
ATGTCGTCTTCATGTGTCTTGCAATGAACTGTTTCAGTAGCCAATCCTCTTTCTTAGTAT  
ATGAAAGGACAGGGATTTTTGTTCTTGTGTTCTCGTTGTTGTTTTAAGTTTACTGGGGA  
AAGTGCATTTGGCCAAATGAAATGGTAGTCAAGCCTATTGCAACAAAGTTAGGAAGTTT  
GTTGTTTGTATTATAAACAAAAGCATGTGAAAGTGCACCTTAAGATAGAGTTTTTATTA  
ATTACTTACTTATTACCTAGATTTTAAATAGACAATCCAAAGTCTCCCCCTTCGTGTTGCCA  
TCATCTTGTTGAATCAGCCATTTTATCGAGGCTCGTGATCAGTGTTGCAACATAATGAAA  
AAGATGGCTACTGTGCCTTGTGTTACTTAATCATAACAGTAAGCTGACCTGGAAATGAAT  
GAACTATTACTCCTAAGAATTACATTGTATAGCCCCACAGATTAATTTAATTTATTAAT  
TCAAACATGTTAAACGTTACTTTTCATGTACTATGGAAAAGTACAAGTAGGTTTACATTA  
CTGATTTCCAGAAGTAAGTAGTTTCCCCTTTCCTAGTCTTCTGTGTATGTGATGTTGTTA  
ATTTCTTTTATTGCATTATAAAATAAAAGGATTATGTATTTTTAACTAAGGTGAGACATTG  
ATATATCCTTTTGCTACAAGCTATAGCTAATGTGCTGAGCTTGTGCCTTGGTGATTGATT  
GATTGATTGACTGATTGTTTTAACTGATTACTGTAGATCAACCTGATGATTTGTTTGTGTTG  
AAATTGGCAGGAAAAATGCAGCTTTCAAATCATTGGGGGGAGAAAAAGGATGTCTTTCA  
GGATTATTTTTATTAATTTTTTTTCATAATTGAGACAGAACTGTTTGTATGTACCATAATG  
CTAAATAAACTGTGGCACTTTTCACCATAATTTAATTTAGTGGAAAAAGAAGACAATGC  
TTTCCATATTGTGATAAGGTAACATGGGGTTTTTCTGGGCCAGCCTTTAGAACACTGTTA  
GGGTAC

## Porcine retinal explants

The eyes of domestic pigs were obtained from the local abattoir (Biberach, Germany) directly *post mortem*, and were transported on ice. Each eye was cleaned from the surrounding tissues in PBS Antibiotic-Antimycotic (Gibco). The eyes were opened with scissors, and, after removal of the cornea, lens and vitreous body, the eye cup was washed in medium, consisting of Neurobasal®-A medium supplemented with 2mM L-glutamine, B-27®supplement, Antibiotic-Antimycotic (all from Gibco). The eye cup was opened with four cuts. The retina was moistened with medium and retinal pieces were excised with a biopsy punch ( $\varnothing = 4$  mm, Electron Microscopy Sciences). The explants were transferred to Millicell® PCF 6 well membranes (Millipore), ensuring that the photoreceptor layer faced the supporting membrane. The inserts were then placed in a 6-well plate (Millipore) with 1.5ml medium per well, and maintained in an incubator (37°C, 5% CO<sub>2</sub>). 50% of the culture medium was replaced every second day. 4  $\mu$ L of AAV suspension ( $1 \times 10^9$  VG/ $\mu$ L) was applied at the first day of culture to the ganglion cell layer side of the tissue.

## pVEGFR2 alphaLISA

To measure VEGF activity, porcine retinal explant supernatants were used to stimulate primary Human Retinal Microvascular Endothelial Cells (HRMEC, ACBRI 181, Cell Systems). Phosphorylation of VEGF Receptor 2 (VEGFR2) as a readout for VEGF activity was measured by the AlphaLISA SureFire Ultra™ pVEGFR2 (Tyr1175) assay (PerkinElmer) according to the manufacturer's manual. Samples were measured with an EnVision 2104 Multilabel plate reader (PerkinElmer). Recombinant human VEGF (rhVEGF, 293-VE, RnD systems) was used as positive control.

## HEK Blue reporter assays

HEK Blue™ TNF- $\alpha$  and HEK Blue™ IL-6 reporter cells (InvivoGen) stably express alkaline phosphatase under the control of TNF- $\alpha$  and IL-6 inducible promoters, respectively. Porcine retinal explants were used to stimulate HEK Blue reporter cells to test for TNF- $\alpha$  and IL-6 activity. Recombinant human TNF- $\alpha$  (rhTNF- $\alpha$ , 210-TA, RnD Systems) and recombinant human IL-6 (rhIL-6, 206-IL, RnD Systems) were used as positive and negative controls. Alkaline phosphatase activity was measured with the QUANTI-Blue kit (InvivoGen) and a SpectraMax Plus 384 plate reader (Molecular Devices).

## Supplemental Figures

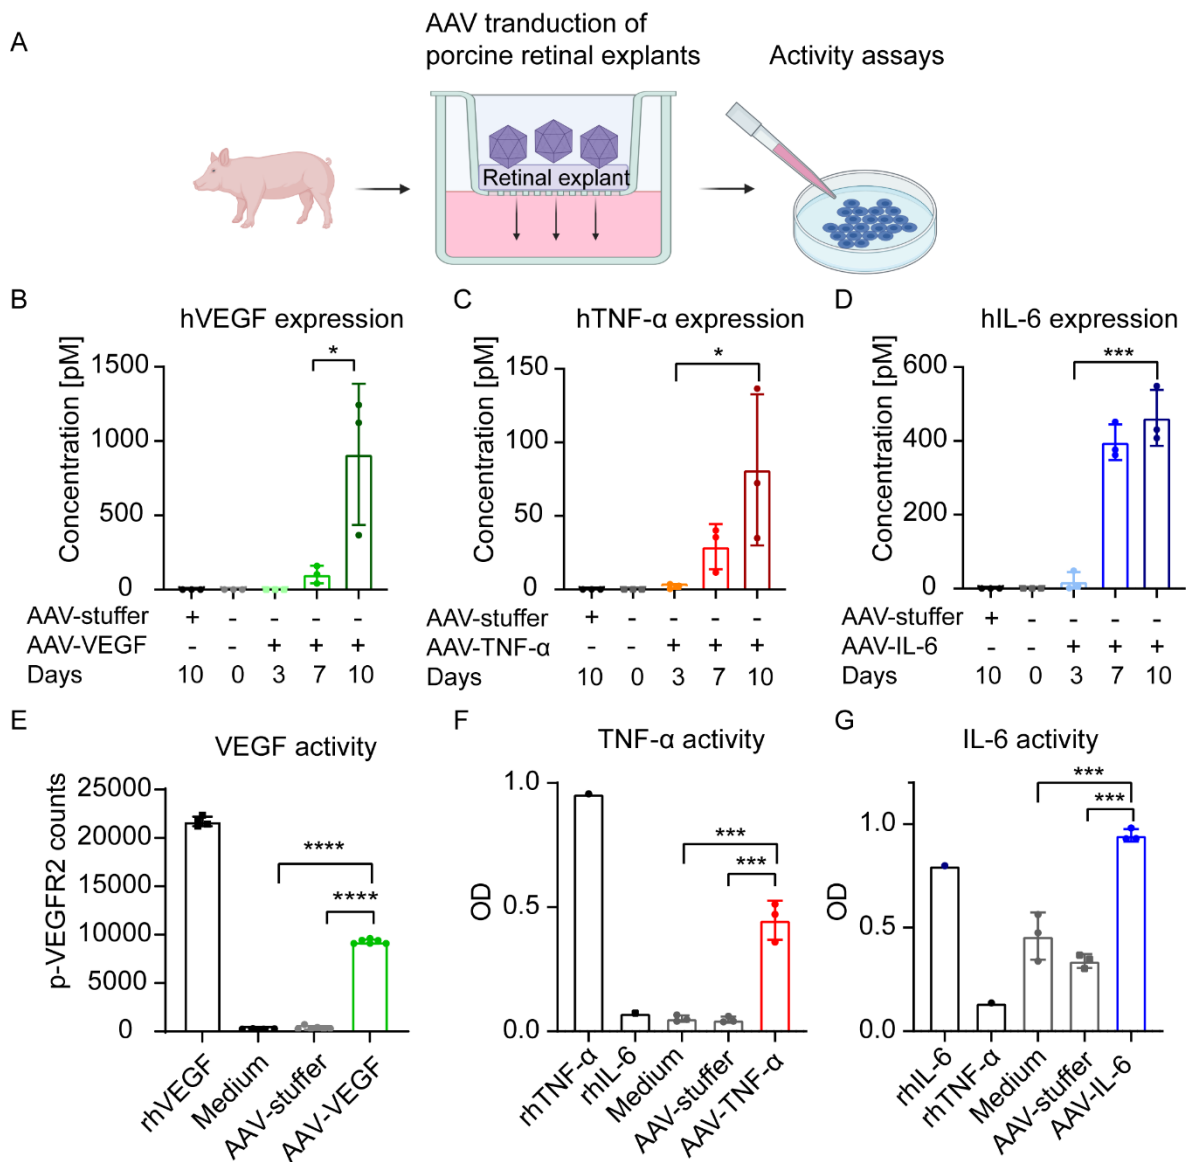

**Supplemental Figure 1: Human VEGF, TNF- $\alpha$  and IL-6 were expressed by AAVs in porcine retinal explants and are functionally active.** A) Scheme of the experimental setup. Porcine retinal explants are transduced by AAVs and the supernatant has been used to measure the activity of AAV-expressed human VEGF, TNF- $\alpha$  and IL-6. B-D) VEGF (B), TNF- $\alpha$  (C) and IL-6 (D) were expressed in porcine retinal explants 7-10 days after AAV transduction as measured by ELISA (n=3). E) AAV-expressed VEGF in porcine retinal explant supernatants phosphorylated pVEGFR2 in HRMEC cells (\*\*\*\*p<0.0001, n=6). F) AAV-expressed TNF- $\alpha$  in porcine retinal explant supernatants activated the TNF- $\alpha$  reporter gene in HEK Blue TNF- $\alpha$  cells (\*\*\*p<0.001, n=3). G) AAV-expressed IL-6 in porcine retinal explant supernatants activated the IL-6 reporter gene in HEK Blue IL-6 cells (\*\*\*p<0.001, n=3). Statistical analysis was done by 1-way ANOVA with Tukey's post hoc test.

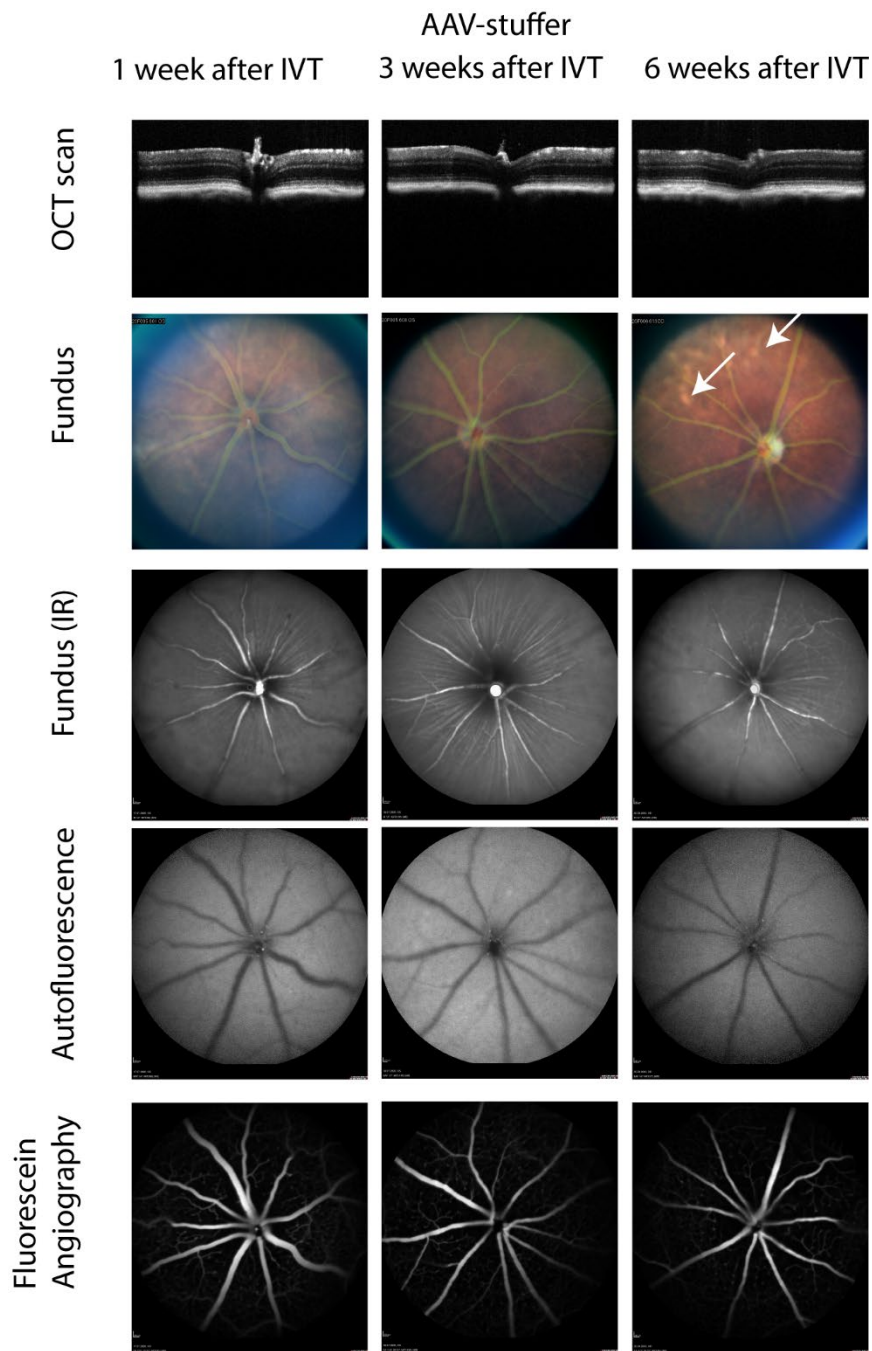

**Supplemental Figure 2: *In vivo* imaging analysis of AAV-stuffer injected control mice did not reveal any obvious pathologies.** OCT scans (top row), fundus pictures, autofluorescence and FFA appeared normal 1-6 weeks after  $4 \times 10^9$  VG/eye AAV-stuffer injection. In few mice we observed bright unspecific spots in the fundus pictures (white arrow) that were also seen in eyes injected with other ShH10 viruses (see Figure 2A).

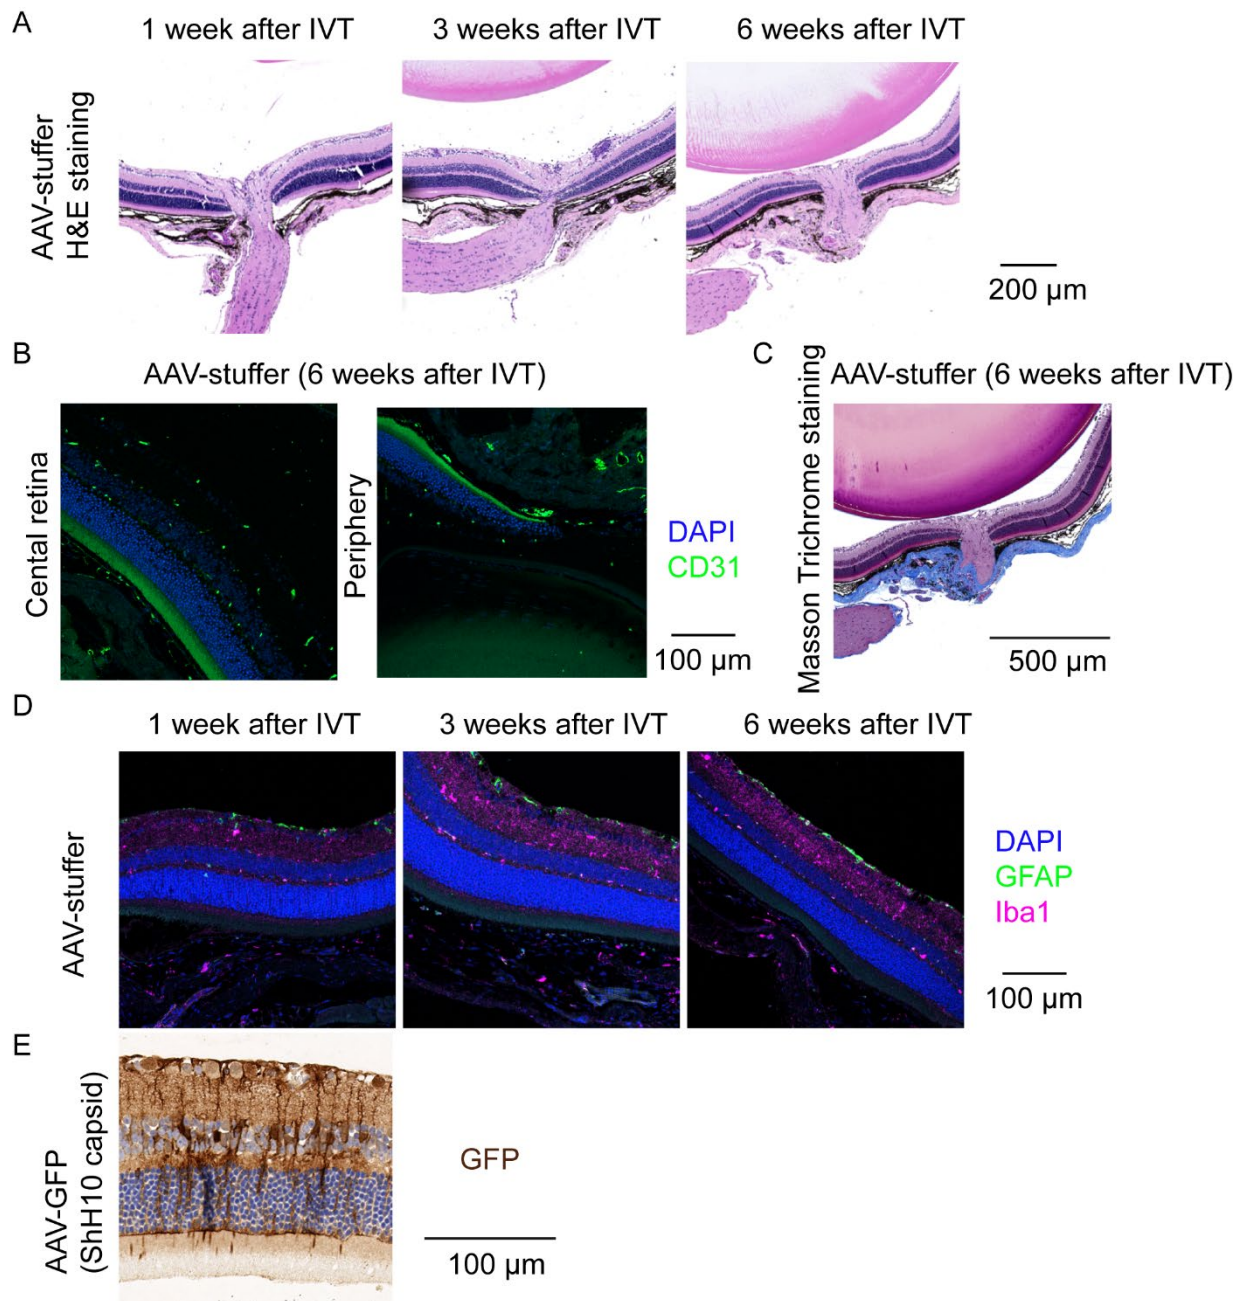

**Supplemental Figure 3: Analysis of histological cross-sections of AAV-stuffer injected eyes.** A) No major pathologies were observed in H&E stainings of eyes injected with AAV-stuffer ( $4 \times 10^9$  VG/eye). B) CD31 immunostaining demonstrated normal vasculature in AAV-stuffer injected eyes (CD31: green, DAPI: blue). C) No collagen (light blue) was found within the retina of AAV-stuffer injected eyes 6 weeks after IVT injection (Masson Trichrome staining). D) Neither Iba1<sup>+</sup> microglia/macrophages nor Müller glia (green) were activated in AAV-stuffer injected eyes (Iba1: pink, GFAP: green, DAPI: blue). E) Many Müller glia, but also few RGCs and photoreceptor cells were GFP-positive after IVT injection of  $3 \times 10^9$  VG/eye AAV-GFP with the ShH10-capsid (brown: GFP, blue: nuclei).
